# Supplementary material for: Electronic communication in oligonuclear ferrocene complexes with anionic four-coordinate boron bridges
Source: Royal Society of Chemistry journal article supplement (doi:10.1039/b821406a), 2009-01-01

## **Electronic Communication in Oligonuclear Ferrocene Complexes with Anionic Four-Coordinate Boron Bridges**

**Linda Kaufmann, Jens-Michael Breunig, Hannes Vitze, Frauke Schödel, Israel Nowik,  
Markus Pichlmaier, Michael Bolte, Hans-Wolfram Lerner, Rainer F. Winter, Rolfe H.  
Herber and Matthias Wagner\***

# **Supplementary Material**

### Synthesis of 5

A solution of MeOSiMe<sub>3</sub> (0.36 g, 3.47 mmol) in toluene (8 mL) was added dropwise with stirring at -78 °C to a solution of BrBPh<sub>2</sub> (0.85 g, 3.47 mmol) in toluene (12 mL). The reaction mixture was slowly warmed to r. t. and stirred overnight. All volatiles were removed from the reaction mixture in vacuo and the crude oily product was extracted into hexane. Yield of **5**: 0.48 g (71 %).

All NMR data were consistent with the values for MeOBPh<sub>2</sub> reported in the following reference: P. J. Domaille, J. D. Druliner, L. W. Gosser, J. M. Read, Jr., E. R. Schmelzer and W. R. Stevens, *J. Org. Chem.*, 1985, **50**, 189.

### Crystal Structure Analysis of 7

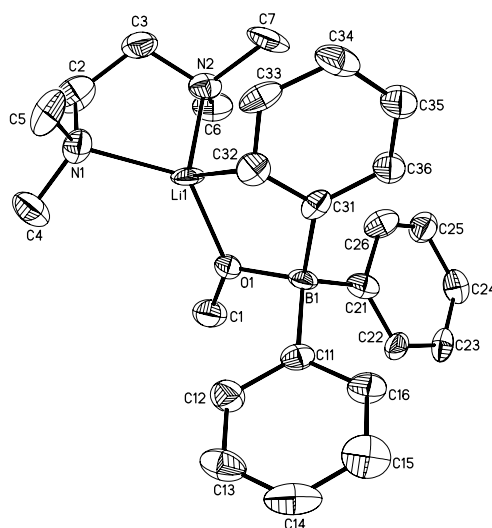

**Figure 1S:** Structure of **7** in the crystal. Displacement ellipsoids are drawn at the 50 % probability level. H atoms omitted for clarity. Selected bond lengths (Å), and bond angles (°): B(1)-O(1) = 1.553(16), B(1)-C(11) = 1.688(16), B(1)-C(21) = 1.594(18), B(1)-C(31) = 1.662(17); C(11)-B(1)-C(21) = 113.0(10), C(11)-B(1)-C(31) = 107.0(9), C(21)-B(1)-C(31) = 112.5(9), O(1)-B(1)-C(11) = 108.0(9), O(1)-B(1)-C(21) = 111.3(10), O(1)-B(1)-C(31) = 104.4(9).

**Table 1S:** Crystallographic Data of 7.

| compound                                             | 7                                                   |
|------------------------------------------------------|-----------------------------------------------------|
| formula                                              | C <sub>25</sub> H <sub>34</sub> BLiN <sub>2</sub> O |
| fw                                                   | 396.29                                              |
| colour, shape                                        | colourless, plate                                   |
| temperature (K)                                      | 173(2)                                              |
| crystal system                                       | monoclinic                                          |
| space group                                          | <i>P</i> 2 <sub>1</sub> / <i>n</i>                  |
| <i>a</i> (Å)                                         | 11.551(4)                                           |
| <i>b</i> (Å)                                         | 13.504(5)                                           |
| <i>c</i> (Å)                                         | 16.349(4)                                           |
| $\alpha$ (°)                                         | 90                                                  |
| $\beta$ (°)                                          | 98.36(2)                                            |
| $\gamma$ (°)                                         | 90                                                  |
| <i>V</i> (Å <sup>3</sup> )                           | 2523.1(14)                                          |
| <i>Z</i>                                             | 4                                                   |
| <i>D</i> <sub>calcd.</sub> (g cm <sup>-3</sup> )     | 1.043                                               |
| <i>F</i> (000)                                       | 856                                                 |
| $\mu$ (mm <sup>-1</sup> )                            | 0.062                                               |
| crystal size (mm <sup>3</sup> )                      | 0.16 × 0.09 × 0.04                                  |
| no. of rflns collected                               | 14212                                               |
| no. of indep rflns ( <i>R</i> <sub>int</sub> )       | 4444 (0.2274)                                       |
| data / restraints / parameters                       | 4444 / 0 / 272                                      |
| GOOF on <i>F</i> <sup>2</sup>                        | 0.989                                               |
| <i>R</i> 1, <i>wR</i> 2 ( <i>I</i> > 2σ( <i>I</i> )) | 0.1613, 0.2526                                      |
| <i>R</i> 1, <i>wR</i> 2 (all data)                   | 0.4022, 0.3728                                      |
| largest diff peak<br>and hole (eÅ <sup>-3</sup> )    | 0.227, -0.260                                       |

**Figure 2S:** Spectroscopic changes upon the first a), second (b) and third (c) oxidation of Li[10] in an OTTLE cell (0.2 M [NBu<sub>4</sub>][PF<sub>6</sub>]; 1,2-C<sub>2</sub>H<sub>4</sub>Cl<sub>2</sub>).

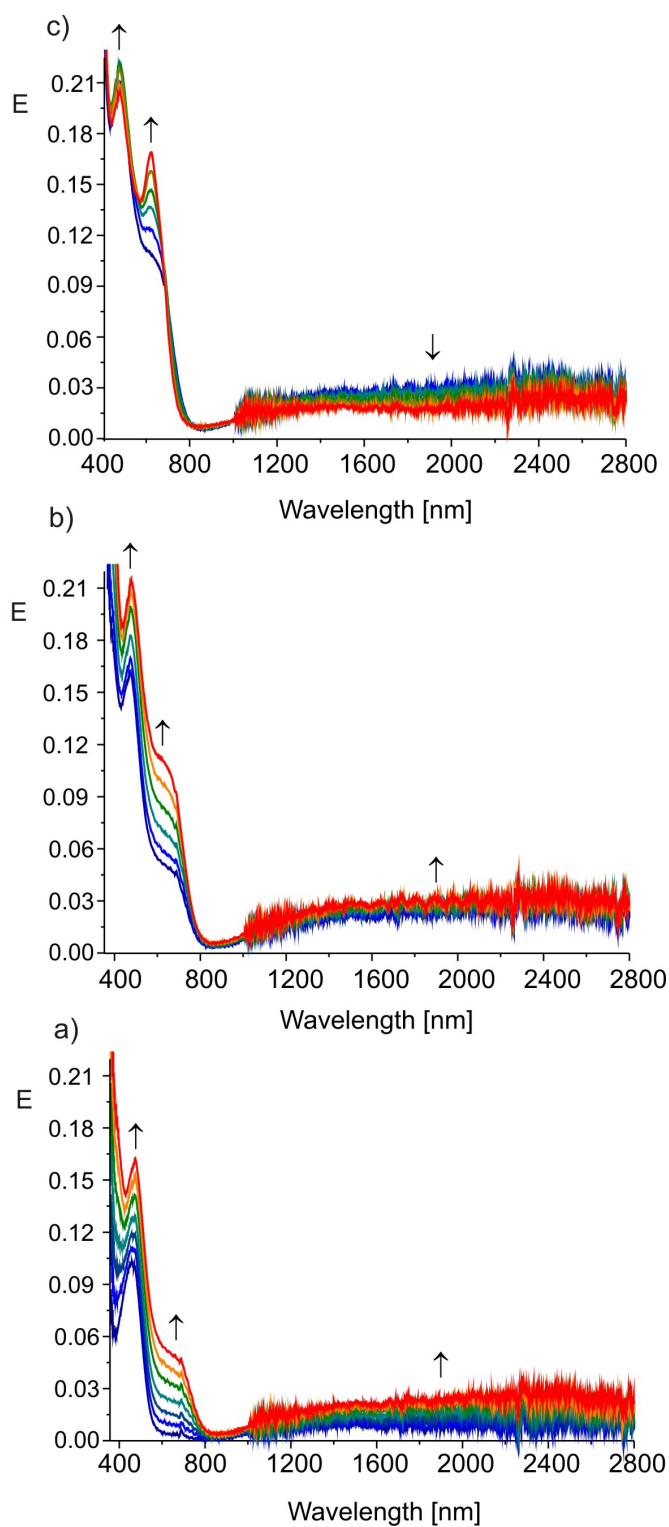

Supplement: b821406a.pdf [file b821406a.pdf]
